# Supplementary material
Source: PubMed Central journal article supplement (PMC8097363)
Supplement: EMBR-22-e52130-s009.pdf [file EMBR-22-e52130-s009.pdf]

# Appendix

## Table of Contents

|                                      |   |
|--------------------------------------|---|
| <i>Appendix Figure S1</i> .....      | 2 |
| <i>Appendix Figure S2</i> .....      | 3 |
| <i>Appendix Figure legends</i> ..... | 4 |

# Appendix Figure S1

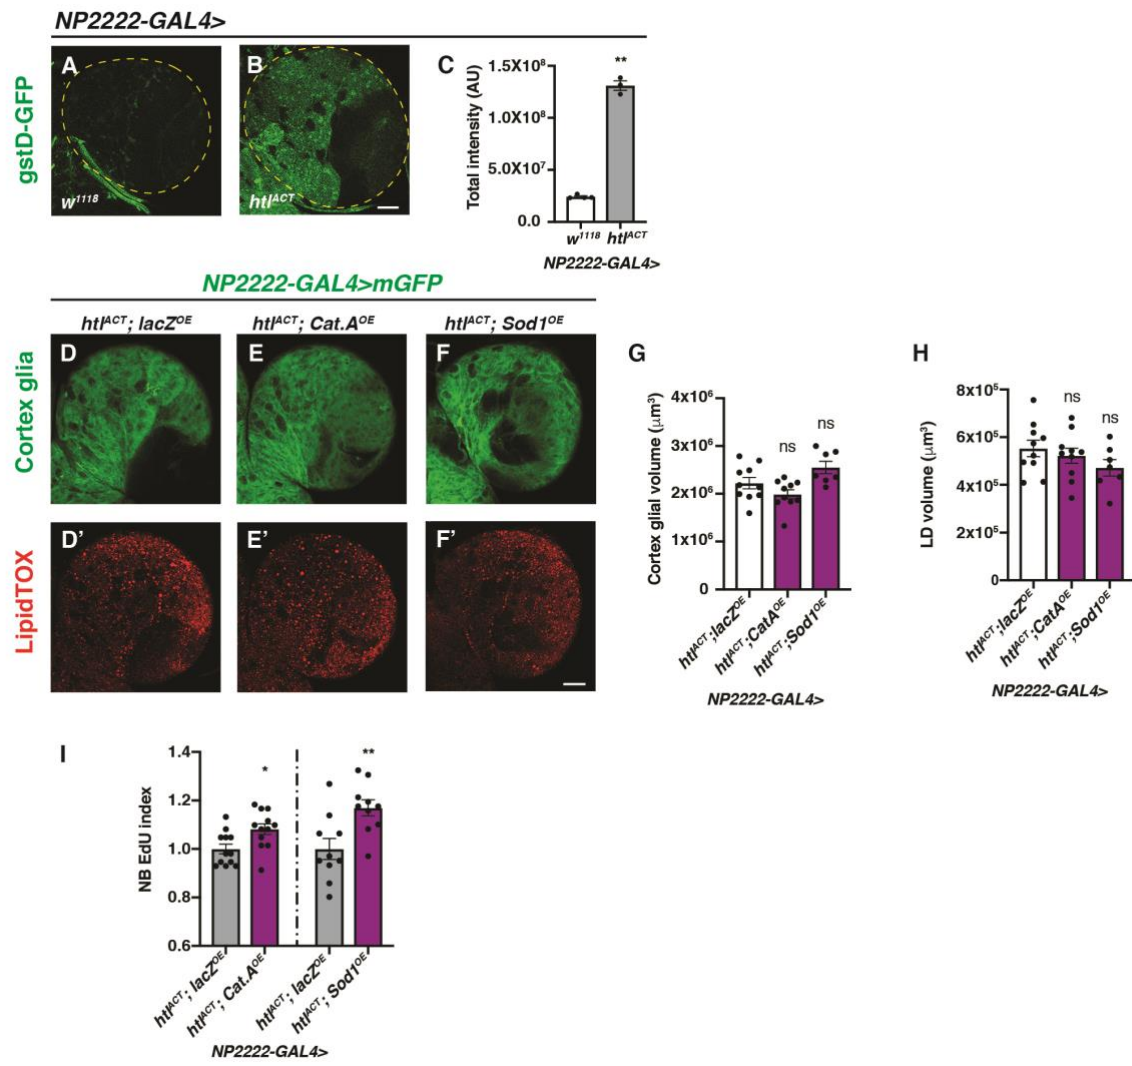

## Appendix Figure S2

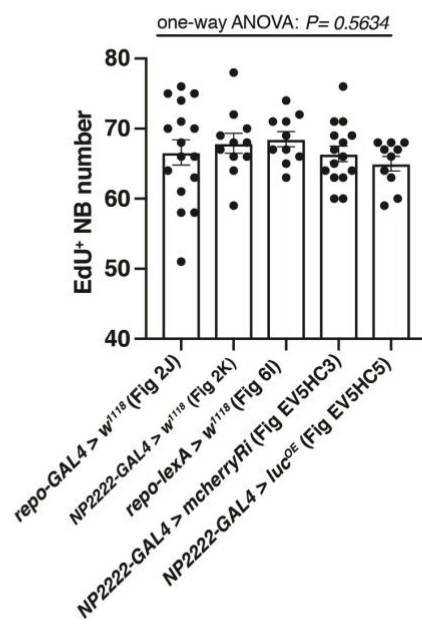

## Appendix Figure legends

### Appendix Figure S1. Glial ROS acts in parallel with lipid-Hh signalling to regulate NB proliferation downstream of glial FGF activation (related to Fig 7)

A-C) Representative images showing that the oxidative stress indicator gstD-GFP is significantly increased, by cortex glial (*NP2222-GAL4*) overexpression of *htl<sup>ACT</sup>*, quantified in C (n=4,3 brain lobes). Region of interest is outlined with yellow dashed lines.

D-H) Representative images showing that cortex glial (*NP2222-GAL4>*) overexpression of ROS scavengers *Cat.A* or *Sod.1* does not alter the size of cortex glia (marked with mGFP) or the number of LDs, quantified in G and H, respectively (n=10,10,7 brain lobes).

I) Cortex glial (*NP2222-GAL4>*) overexpression of ROS scavengers *Cat.A* or *Sod.1* significantly rescues NB EdU incorporation defects caused by *htl<sup>ACT</sup>* overexpression, quantified in I (n=12,12;10,10 brain lobes).

Region of interest are outlined with yellow dashed line.

Scale bar=50  $\mu$ m in A-B, D-F.

Data information: Error bar represents SEM.

In (C): Welch's t test, (\*\*) $p=0.0013$ . In (G): unpaired t test, (ns) $p=0.1410$ ; unpaired t test, (ns) $p=0.0858$ . In (H): unpaired t test, (ns) $p=0.5173$ ; unpaired t test, (ns) $p=0.1280$ . In (I): unpaired t test, (\*) $p=0.0120$ ; unpaired t test, (\*\*) $p=0.0059$ .

### Appendix Figure S2. EdU<sup>+</sup> NB number quantification in controls

EdU<sup>+</sup> NB number is not significantly different within the controls *GAL4* or *lexA > w<sup>1118</sup>*, or *UAS-mcherryRNAi*, or *UAS-luc* (n=16,11,10,15,10 brain lobes).

Data information: Error bar represents SEM.

One-way ANOVA,  $p=0.5634$ .
